# Supplementary material
Source: bioRxiv or medRxiv preprint supplement (https://www.biorxiv.org/highwire/filestream/15453/field_highwire_adjunct_files/1/040592-2.zip)
Supplement: Supplementary file [file 040592-2.zip]

**Supplemental Table I. Number of differentially expressed (DE) genes in *cis*, *trans*, and the total number of DE genes for the ILs along with number of genes in the introgression region.**

| IL       | Cis DE | Trans DE | All DE | Genes in IL |
|----------|--------|----------|--------|-------------|
| IL1.1    | 264    | 156      | 420    | 2563        |
| IL1.1.2  | 17     | 62       | 79     | 113         |
| IL1.1.3  | 57     | 90       | 147    | 487         |
| IL1.2    | 4      | 15       | 19     | 444         |
| IL1.3    | 98     | 55       | 153    | 837         |
| IL1.4    | 120    | 62       | 182    | 928         |
| IL1.4.18 | 24     | 54       | 78     | 204         |
| IL2.1    | 79     | 37       | 116    | 894         |
| IL2.1.1  | 26     | 57       | 83     | 409         |
| IL2.2    | 32     | 46       | 78     | 252         |
| IL2.3    | 151    | 87       | 238    | 1091        |
| IL2.4    | 171    | 79       | 250    | 1182        |
| IL2.5    | 188    | 400      | 588    | 1242        |
| IL2.6    | 40     | 34       | 74     | 466         |
| IL2.6.5  | 25     | 179      | 204    | 170         |
| IL3.1    | 27     | 43       | 70     | 191         |
| IL3.2    | 229    | 447      | 676    | 1855        |
| IL3.3    | 265    | 466      | 731    | 1978        |
| IL3.4    | 96     | 207      | 303    | 785         |
| IL3.5    | 49     | 47       | 96     | 483         |
| IL4.1    | 80     | 245      | 325    | 573         |
| IL4.1.1  | 13     | 47       | 60     | 98          |
| IL4.2    | 127    | 105      | 232    | 1477        |
| IL4.3    | 282    | 882      | 1164   | 1971        |
| IL4.3.2  | 112    | 84       | 196    | 1331        |
| IL4.4    | 49     | 69       | 118    | 465         |
| IL5.1    | 39     | 75       | 114    | 294         |
| IL5.2    | 18     | 40       | 58     | 140         |
| IL5.3    | 69     | 39       | 108    | 1129        |
| IL5.4    | 18     | 37       | 55     | 169         |
| IL5.5    | 23     | 78       | 101    | 255         |
| IL6.1    | 142    | 89       | 231    | 1211        |
| IL6.2    | 167    | 430      | 597    | 1095        |
| IL6.2.2  | 162    | 2352     | 2514   | 685         |
| IL6.3    | 101    | 159      | 260    | 696         |
| IL6.4    | 23     | 41       | 64     | 146         |
| IL7.1    | 26     | 173      | 199    | 258         |
| IL7.2    | 151    | 363      | 514    | 1053        |
| IL7.3    | 122    | 551      | 673    | 729         |
| IL7.4.1  | 167    | 125      | 292    | 1443        |
| IL7.5    | 39     | 40       | 79     | 368         |
| IL7.5.5  | 33     | 33       | 66     | 335         |

|          |     |     |     |      |
|----------|-----|-----|-----|------|
| IL8.1    | 138 | 669 | 807 | 1184 |
| IL8.1.1  | 130 | 404 | 534 | 1183 |
| IL8.1.5  | 64  | 221 | 285 | 361  |
| IL8.2    | 124 | 398 | 522 | 890  |
| IL8.2.1  | 78  | 31  | 109 | 679  |
| IL8.3    | 53  | 40  | 93  | 512  |
| IL8.3.1  | 15  | 32  | 47  | 127  |
| IL9.1    | 53  | 77  | 130 | 523  |
| IL9.1.2  | 31  | 40  | 71  | 257  |
| IL9.1.3  | 69  | 168 | 237 | 536  |
| IL9.2    | 148 | 90  | 238 | 1575 |
| IL9.2.5  | 6   | 56  | 62  | 86   |
| IL9.2.6  | 31  | 48  | 79  | 370  |
| IL9.3    | 104 | 86  | 190 | 714  |
| IL9.3.1  | 85  | 186 | 271 | 518  |
| IL9.3.2  | 39  | 43  | 82  | 320  |
| IL10.1   | 150 | 97  | 247 | 1864 |
| IL10.1.1 | 42  | 159 | 201 | 317  |
| IL10.2   | 77  | 192 | 269 | 690  |
| IL10.2.2 | 30  | 40  | 70  | 238  |
| IL10.3   | 36  | 41  | 77  | 387  |
| IL11.1   | 67  | 258 | 325 | 587  |
| IL11.2   | 141 | 309 | 450 | 1638 |
| IL11.3   | 90  | 99  | 189 | 1459 |
| IL11.4   | 26  | 70  | 96  | 234  |
| IL11.4.1 | 11  | 33  | 44  | 102  |
| IL12.1   | 27  | 50  | 77  | 240  |
| IL12.1.1 | 19  | 515 | 534 | 125  |
| IL12.2   | 188 | 138 | 326 | 1805 |
| IL12.3   | 200 | 70  | 270 | 1989 |
| IL12.3.1 | 46  | 121 | 167 | 432  |
| IL12.4   | 57  | 183 | 240 | 458  |
