# Supplementary material
Source: bioRxiv or medRxiv preprint supplement (https://www.biorxiv.org/highwire/filestream/15453/field_highwire_adjunct_files/1/040592-2.zip)
Supplement: Supplementary file [file 040592-2.zip]

| <b>Supplemental Table IV. Leaf developmental phenotypes of selected ILs and genetic effects of eQTL (bin) on expression pattern of candidate genes.</b> |                                                                                                           |                             |                                                                       |                             |                               |                                     |                             |
|---------------------------------------------------------------------------------------------------------------------------------------------------------|-----------------------------------------------------------------------------------------------------------|-----------------------------|-----------------------------------------------------------------------|-----------------------------|-------------------------------|-------------------------------------|-----------------------------|
| <b>ILs with significant leaf phenotype and associated eQTL(bin)</b>                                                                                     |                                                                                                           |                             | <b>Leaf developmental genes regulated by the regulatory eQTL(bin)</b> |                             |                               |                                     |                             |
| <b>ILs</b>                                                                                                                                              | <b>Leaf developmental phenotype</b>                                                                       | <b>Regulatory eQTL(bin)</b> | <b>itag</b>                                                           | <b>chromosomal location</b> | <b>Arabidopsis orthologue</b> | <b>Gene_name</b>                    | <b>Nature of regulation</b> |
| <b>IL2.1</b>                                                                                                                                            | transgressively narrower leaflet; reduced leaf complexity                                                 | 2C                          | Solyc02g064960                                                        | ch02:30651561-30655131      | AT4G36920                     | APETALA 2                           | cis_down                    |
|                                                                                                                                                         |                                                                                                           | 2C                          | Solyc12g010370                                                        | ch12:3424498-3425863        | AT4G28190                     | ULTRAPETALA 1                       | trans_up                    |
|                                                                                                                                                         |                                                                                                           | 2C                          | Solyc12g010760                                                        | ch12:3676998-3678363        | AT4G28190                     | ULTRAPETALA 1                       | trans_up                    |
| <b>IL4.3</b>                                                                                                                                            | wider leaflet; decreased length-to-width ratio; decreased serration and lobing; decreased leaf complexity | 4I                          | Solyc04g079830                                                        | ch04:61729325-61740234      | AT4G36870                     | SAWTOOTH 1                          | cis_up                      |
|                                                                                                                                                         |                                                                                                           | 4I                          | Solyc04g080780                                                        | ch04:62460512-62462135      | AT1G75430                     | BEL1-LIKE HOMEODOMAIN 11            | cis_up                      |
|                                                                                                                                                         |                                                                                                           | 4H                          | Solyc05g012840                                                        | ch05:5987496-5988167        | AT3G15030                     | TCP5                                | trans_up                    |
|                                                                                                                                                         |                                                                                                           | 4I                          | Solyc05g026480                                                        | ch05:41470829-41477244      | AT4G32551                     | LEUNIG                              | trans_up                    |
|                                                                                                                                                         |                                                                                                           | 5F                          | Solyc05g054180                                                        | ch05:63284096-63288543      | AT5G48160                     | OBERON 2                            | cis_up                      |
| <b>IL5.4</b>                                                                                                                                            | wider leaflet; transgressively more serrated and has increased leaf complexity                            | 5D                          | Solyc12g010370                                                        | ch12:3424498-3425863        | AT4G28190                     | ULTRAPETALA 1                       | trans_up                    |
|                                                                                                                                                         |                                                                                                           | 5D                          | Solyc12g010760                                                        | ch12:3676998-3678363        | AT4G28190                     | ULTRAPETALA 1                       | trans_up                    |
|                                                                                                                                                         |                                                                                                           | 8B                          | Solyc06g065630                                                        | ch06:37403377-37405689      | AT5G11320                     | YUCCA 4                             | trans_down                  |
| <b>IL8.1/IL8.1.1/IL8.1.5</b>                                                                                                                            | Strong decrease in leaf complexity; decreased serration                                                   | 8B                          | Solyc08g048390                                                        | ch08:39810608-39811771      | AT4G18390                     | TCP2                                | cis_up                      |
|                                                                                                                                                         |                                                                                                           | 8A                          | Solyc04g077490                                                        | ch04:60022685-60026057      | AT4G37750                     | AINTEGUMENTA                        | trans_down                  |
|                                                                                                                                                         |                                                                                                           | 8A                          | Solyc06g065630                                                        | ch06:37403377-37405689      | AT5G11320                     | YUCCA 4                             | trans_down                  |
|                                                                                                                                                         |                                                                                                           | 8A                          | Solyc08g006910                                                        | ch08:1487865-1491860        | AT4G32551                     | LEUNIG                              | cis_down                    |
|                                                                                                                                                         |                                                                                                           | 8A                          | Solyc12g014500                                                        | ch12:5468306-5475778        | AT5G55250                     | IAA CARBOXYLMETHYLTRANSFERASE 1     | trans_down                  |
|                                                                                                                                                         |                                                                                                           | 9A                          | Solyc06g074730                                                        | ch06:42661355-42667953      | AT2G27880                     | ARGONAUTE 5                         | trans_up                    |
| <b>IL9.1.2</b>                                                                                                                                          | transgressively narrower leaflet; reduced leaf complexity; increased serration and lobing                 | 9B                          | Solyc07g062470                                                        | ch07:62414891-62417919      | AT2G42610                     | LIGHT-DEPENDENT SHORT HYPOCOTYLS 10 | trans_up                    |
|                                                                                                                                                         |                                                                                                           | 9B                          | Solyc09g007830                                                        | ch09:1356808-1361135        | AT2G37210                     | LONELY GUY 3                        | cis_down                    |
