# Supplementary material
Source: bioRxiv or medRxiv preprint supplement (https://www.biorxiv.org/highwire/filestream/15453/field_highwire_adjunct_files/1/040592-2.zip)
Supplement: Supplementary file [file 040592-2.zip]

**Supplemental Table V. Significant correlations between gene expression patterns and phenotypes.** Bootstrapping analyses correlated gene expression patterns across the 74 ILs with three phenotypes in under both sun and shade treatments. Genes with significant correlations that also have eQTL are listed.

| Phenotype        | Treatment | Significant Positive Correlations | Significant Negative Correlations | Significant Positive Correlations with eQTL | Significant Negative Correlations with eQTL |
|------------------|-----------|-----------------------------------|-----------------------------------|---------------------------------------------|---------------------------------------------|
| Leaf Number      | Sun       | 257                               | 27                                | 112                                         | 17                                          |
|                  | Shade     | 22                                | 0                                 | 15                                          | 0                                           |
| Leaf Complexity  | Sun       | 8                                 | 9                                 | 5                                           | 6                                           |
|                  | Shade     | 17                                | 28                                | 11                                          | 14                                          |
| Hypocotyl Length | Sun       | 0                                 | 1                                 | 0                                           | 1                                           |
|                  | Shade     | 11                                | 1                                 | 5                                           | 1                                           |
